# Supplementary material
Source: Research Square preprint supplement (doi:10.21203/rs.3.rs-10164584/v1)
Supplement: Supplementary file 1 [file 65e122f7d24cc8bda3a6ac79.xlsx]

## Sheet: Sheet1
Genome editing
crRNA	GTTGGTCCTGAAGACTGGAT
ssODN	AATGGAATTAATTCTTGtttttttCTTAAGGCCTACATGAATCCAATAGCAATGGCTCGATCAAGGGGTCCAATCTAGcTGAcTAAgctTGAcTAGcTAACAGTCTTCAGGACCAACAATCCAGGATTATCTGAATCGACCAAGGCCTACCTGGTATTTCTCAGTTTACTTGTTT
PCR_check_FW	GCAATGGCTCGATCAAGGGG
PCR_check_RV	TCATTTGGCAAGTGCTCAACAAT
Primers used for quantification of RI/spliced by RT-qPCR
Map4k2_spliced_FW	CAATGAACCGTGGGAGGAGG
Map4k2_spliced_RV	TCTAAGGCTGGCCGGATAGT
Map4k2_retained_FW	TCTCCCTGTCCATCTCCTGAAA
Map4k2_retained_RV	CAGCAGGCTCCCACTCAGTTC
Cacna1c_spliced_FW	GGGCATAATAGATGTTCCGGC
Cacna1c_spliced_RV	GTCGAAGTTGGTGATGCCGT
Cacna1c_retained_FW	GTCTCCTGTTTCCTTGGTGGT
Cacna1c_retained_RV	ATCATTGACCCAGTACAGCAC
Pak4_spliced_FW	CAGTGGCAGAGCCTGATTGA
Pak4_spliced_RV	CGAACGATGGTCTTGGGGG
Pak4_retained_FW	ttcagaccagGTGCCTGTAAG
Pak4_retained_RV	GGTGTGGTGATGGCTACCTT
Tsc2_spliced_FW	GCCCTTTCGGAAGGATTTCG
Tsc_spliced_RV	TCCTCAAACTTTTGGGTCTCTCA
Tsc2_retained_FW	CCTCGCCCGGTAGTTTGAG
Tsc2_retained_RV	TCTGTATTCTGCTGCGGAC
Map4k2_EGFP_spliced_FW	TCTCAATGAACCGTGGGAGGA
Map4k2_EGFP_spliced_RV	GTGAACAGCTCCTCGCCCTT
Gene fragments for plasmid construction
Map4k2_WT_minigene_FL	AGATCTgccaccATGtTTCACCAAGTGAAATTCGGTGCTCCTCGCCGGAAGGAGACAGATCCTCTCAATGAACCGGTGAGGCACTGGCTATGTGTGTGTAGAGGGGGTTCGGGGAAGGGAGGCTTGGGTGTGCAGATGCAGGTGGAATGTCCCAAATCACAGCCAGTCTGAAGCAGGGGTTGCCTGTGTCATCTGGGGACTCCCCCTGGGCTTGCGTCACCTGGGGTCCTGGGCTAGAGGATCCCCTCCGCCATTTTCCTTTAGACAGTACTGGAATGTGGAAGACTGGCCACACCCTTTTGAAACCTAGGTTTCACAGGACTAAGGGCTCCCCACTTGGCCATATTCCTCAGTGTGCCTGTCACAGGACCACATCACCCCGTCTCCTCTTACTGTCCG…
Map4k2_AdV3SS50_minigene	AGATCTgccaccATGtTTCACCAAGTGAAATTCGGTGCTCCTCGCCGGAAGGAGACAGATCCTCTCAATGAACCGGTGAGGCACTGGCTATGTGTGTGTAGAGGGGGTTCGGGGAAGGGAGGCTTGGGTGTGCAGATGCAGGTGGAATGTCCCAAATCACAGCCAGTCTGAAGCAGGGGTTGCCTGTGTCATCTGGGGACTCCCCCTGGGCTTGCGTCACCTGGGGTCCTGGGCTAGAGGATCCCCTCCGCCATTTTCCTTTAGACAGTACTGGAATGTGGAAGACTGGCCACACCCTTTTGAAACCTAGGTTTCACAGGACTAAGGGCTCCCCACTTGGCCATATTCCTCAGTGTGCCTGTCACAGGACCACATCACCCCGTCTCCTCTTACTGTCCG…
Map4k2_TACTAAC_minigene	AGATCTgccaccATGtTTCACCAAGTGAAATTCGGTGCTCCTCGCCGGAAGGAGACAGATCCTCTCAATGAACCGGTGAGGCACTGGCTATGTGTGTGTAGAGGGGGTTCGGGGAAGGGAGGCTTGGGTGTGCAGATGCAGGTGGAATGTCCCAAATCACAGCCAGTCTGAAGCAGGGGTTGCCTGTGTCATCTGGGGACTCCCCCTGGGCTTGCGTCACCTGGGGTCCTGGGCTAGAGGATCCCCTCCGCCATTTTCCTTTAGACAGTACTGGAATGTGGAAGACTGGCCACACCCTTTTGAAACCTAGGTTTCACAGGACTAAGGGCTCCCCACTTGGCCATATTCCTCAGTGTGCCTGTCACAGGACCACATCACCCCGTCTCCTCTTACTGTCCG…
pCANw-U2af2-salEGFP	TTGATACGTACGGTTCGGATCGATATCgccaccATGTCCGATTTCGATGAATTTGAGCGTCAGCTGAATGAAAATAAGCAGGAAAGAGATAAAGAGAACCGTCATCGAAAGCGGAGTCACTCACGTTCCAGATCCCGGGATCGGAAGAGAAGATCTAGATCTCGGGACAGAAGGAATCGGGACCAGCGGAGTGCCAGTCGTGACCGTAGACGGCGGAGCAAGCCTTTGACTCGAGGAGCAAAAGAAGAGCACGGTGGCCTAATCCGCAGTCCTAGGCATGAGAAGAAGAAAAAGGTGCGAAAGTATTGGGATGTTCCTCCTCCCGGCTTCGAACATATAACTCCGATGCAGTACAAGGCCATGCAAGCCGCCGGACAAATTCCGGCGACGGCTCTCTTG…
pCANw-Npm1-salEGFP	TTGATACGTACGGTTCGGATCGATATCgccaccATGGAGGACAGCATGGACATGGACATGAGCCCGCTCCGCCCACAAAACTACCTGTTTGGCTGTGAGCTCAAGGCTGACAAGGACTACCACTTCAAAGTGGACAATGACGAGAACGAGCACCAGTTGTCCCTCAGAACGGTCTCCCTTGGAGCAGGGGCAAAAGATGAGCTGCATATCGTGGAGGCTGAGGCCATGAACTATGAGGGCTCCCCCATCAAGGTCACTCTGGCTACCCTGAAGATGTCCGTGCAGCCCACAGTGTCCCTGGGAGGCTTCGAGATCACCCCTCCTGTGGTGCTGCGGCTTAAGTGCGGCTCGGGACCGGTTCATATTTCTGGCCAGCACCTGGTGGCTGTGGAGGAAGAT…
pLenti-CA-Sena1_FL	TGATACGTACGGTTGAATTCgccaccATGGGGAAACGGGATAATCGCGTGGCCTACATGAATCCAATAGCAATGGCTCGATCAAGGGGTCCAATCCAGTCTTCAGGACCAACAATCCAGGATTATCTGAATCGACCAAGGCCTACCTGGGAGGAAGTCAAGGAACAGCTGGAAAAGAAAAAGAAGGGCTCCAAGGCTTTGGCTGAGTTTGAAGAAAAAATGAATGAGAATTGGAAGAAAGAACTAGAAAAACATAGAGAAAAATTATTAAGTGGAAATGAGAGCTCATCCaaaaaaaGACAGaaaaagaaaaaagaaaagaagaaaTCTGGTAGGTATTCATCTTCTTCTTCATCGAGCTCTGATTCTTCCAGCAGTTCTTCAGATTCCGAAGATGAGG…
pLenti-CA-Sena1_∆N_half_HA	ATTGATTTGATACGTACGGTTGAATTCGCCACCATGGGAGAGGAGGTTAAGGAGCAGCTCGAAAAAAAGAAGAAGGGTTCCAAGGCACTCGCGGAGTTCGAGGAGAAAATGAACGAAAACTGGAAAAAAGAACTGGAGAAGCACCGCGAGAAGCTGCTTAGCGGGAATGAATCTTCCTCCAAGAAACGCCAAAAGAAGAAAAAAGAGAAGAAGAAGTCAGGCAGATACTCCAGTTCTAGTAGCTCAAGTTCAGATAGCTCCTCCAGTAGCTCAGACTCTGAAGACGAGGATAAGAAACAGACCAAGCGACGAAAGAAGAAGAAATCACGGTGTCATAAGAGTCCTGAAAGCTCTGGATCCGATTCCGCTTCTGACTCTAAGGACGGGTCTAAGAAGAAA…
pLenti-CA-Sena1_∆N_helix_HA	ATTGATTTGATACGTACGGTTGAATTCGCCACCATGGGGAAACGGGATAATAGGGTCGCATACATGAACCCTATCGCTATGGCGAGATCTCGGGGACCAATTCAGAGCTCTGGTCCCACAATCCAAGACTACCTTAACAGGCCGAGACCTACCTGGAAAAAAAAGTCTGGTCGCTATTCATCCTCCAGTAGCTCCTCATCTGACTCCTCCAGCTCCTCCTCAGACAGCGAGGATGAGGATAAGAAGCAGACTAAGCGGCGGAAGAAAAAGAAGTCTAGGTGCCACAAGAGTCCCGAGTCCAGCGGCTCTGATAGTGCTAGTGATTCTAAAGACGGCTCAAAAAAGAAGAAGAAAAGCAAGGACGTGACCGAAAGAGAAAAAGATACTAAAGGGCTGAGC…
pLenti-CA-Sena1_∆IDR_1_HA	ATTGATTTGATACGTACGGTTGAATTCGCCACCATGGGCAAGCGGGATAACCGGGTAGCCTACATGAATCCTATTGCAATGGCTAGGAGCCGAGGCCCAATCCAATCTAGCGGTCCCACTATCCAAGACTACCTCAACAGACCGAGGCCAACGTGGGAGGAGGTCAAGGAGCAGTTGGAAAAGAAGAAAAAAGGATCCAAAGCTCTGGCCGAGTTCGAGGAAAAGATGAATGAGAATTGGAAAAAGGAGCTCGAAAAGCACAGAGAAAAGCTGCTTTCTGGAAACGAGTCAAGTTCCAAGAAACGACAGAAAAAGAAGAAAGAAAAAAAGAAAGAGGACGAAGATAAGAAGCAGACCAAACGCAGGAAAAAAAAGAAGAGCCGGTGCCATAAGAGTCCT…
pLenti-CA-Sena1_∆IDR_2_HA	ATTGATTTGATACGTACGGTTGAATTCGCCACCATGGGCAAGCGGGACAATAGGGTGGCTTATATGAACCCCATCGCTATGGCTCGCTCCAGAGGCCCCATCCAGAGTTCTGGACCTACCATTCAGGACTACCTCAACCGACCTAGGCCCACTTGGGAGGAGGTAAAGGAGCAACTCGAGAAAAAGAAGAAGGGCTCAAAGGCCCTGGCGGAATTCGAGGAAAAAATGAATGAAAATTGGAAGAAGGAACTGGAAAAACACAGGGAGAAGCTTTTGTCAGGGAACGAGTCATCCAGTAAGAAGAGACAGAAGAAGAAAAAGGAAAAGAAGAAAAGCGGTCGGTACTCTTCATCAAGTAGTAGCTCTAGCGACAGCTCTTCTTCCTCAAGTGATAGTAAG…
pLenti-CA-Sena1_∆IDR_3_HA	ATTGATTTGATACGTACGGTTGAATTCGCCACCATGGGTAAGCGCGACAATCGAGTTGCCTATATGAATCCCATCGCTATGGCTCGGTCAAGAGGCCCCATTCAGTCAAGCGGCCCAACTATCCAAGATTACCTGAATCGCCCTCGGCCAACATGGGAAGAGGTGAAAGAGCAGCTTGAAAAAAAGAAGAAAGGGAGCAAAGCGTTGGCCGAGTTCGAAGAAAAAATGAACGAGAACTGGAAGAAAGAGCTCGAGAAGCATCGGGAAAAGCTGCTGTCAGGGAACGAGAGCTCTTCCAAGAAAAGGCAGAAGAAGAAAAAGGAAAAGAAGAAATCCGGAAGGTATTCCTCATCCAGTTCTTCTTCTAGTGATAGTTCCTCCTCTAGCAGTGACAGCGAG…
pLenti-CA-Sena1_∆IDR_4_HA	ATTGATTTGATACGTACGGTTGAATTCGCCACCATGGGCAAACGAGATAACAGGGTAGCTTACATGAATCCCATCGCAATGGCCCGGAGCCGGGGGCCCATCCAGAGCAGTGGCCCTACAATTCAGGATTACCTGAATAGACCTCGCCCGACCTGGGAAGAGGTGAAGGAGCAGCTGGAAAAAAAGAAGAAAGGAAGCAAGGCCCTGGCTGAGTTCGAGGAGAAGATGAATGAGAACTGGAAGAAGGAACTTGAAAAGCACAGAGAAAAGCTCTTGTCTGGTAACGAGTCTTCATCCAAAAAAAGGCAAAAGAAGAAAAAGGAGAAGAAGAAATCTGGGAGGTACTCTAGTTCTAGTAGCAGCAGTTCCGACTCATCCTCCAGCTCTAGCGACTCAGAA…
Primers for plasmid constructions
pLenti-CA-Sena1_deltaIDR_HA_FW	GTGGAAATGAGAGCTCATCCTACCCATACGATGTTCCAGA
pLenti-CA-Sena1_deltaIDR_HA_RV	GGATGAGCTCTCATTTCCAC
pLenti-CA-APEX-N1-Sena1_FL_FW	TTGATTTGATACGTACGGTTGAATTCGCCACCATGGGTAAAAGAGATAACCG
pLenti-CA-APEX-N1-Sena1_FL_RV	CCGCCACTACCTCCTCCCCCggatccTGGGGAGTCAGAACTGGAAG
pLenti-CA-APEX-N1-Sena1_∆N_half_FW	TTGATTTGATACGTACGGTTGAATTCGCCACCATGGGAGAGGAGGTTAAGGA
pLenti-CA-APEX-N1-Sena1_∆N_half_RV	CCGCCACTACCTCCTCCCCCggatccAGGAGAATCGCTACTGCTGC
pLenti-CA-APEX-N1-Sena1_∆N_helix_FW	TTGATTTGATACGTACGGTTGAATTCGCCACCATGGGGAAACGGGATAATAG
pLenti-CA-APEX-N1-Sena1_∆N_helix_RV	CCGCCACTACCTCCTCCCCCggatccTGGAGAATCAGATGAGCTTG
LLPS assay
Map4k2_3SS50	CUCUUUUGUGUCUCACCUCUCUUCGGUAUCUCUGCCUCGGUCUCCUCCAG
